# Supplementary material for: Enthalpy of formation of methyl benzoate: calorimetry and consequencesElectronic supplementary information (ESI) available: Physical properties at T = 298.15 K of methyl benzoate. See http://www.rsc.org/suppdata/cp/b2/b202033e/
Source: Royal Society of Chemistry journal article supplement (doi:10.1039/b202033e), 2002-06-20
Supplement: table.doc [file table.doc]

# Supplementary material

TABLE 1. Physical properties at *T* = 298.15 K of methyl benzoate

| Compound | M g·mol-1 | **  g·cm-3 | (*V*/*T*)p·10-7  dm3·g-1·K-1 | *c*p  J·K-1·g-1 |
| --- | --- | --- | --- | --- |
| Polyethylene | 13.6422 | 0.91871 | 0.2481 | 2.01 |
| Mylar | 192.1681 | 1.382 | 0.95982 | 1.322 |
| Cotton | 27.700 | 1.5 | 9.693 | 1.48 |
| Methyl benzoate | 136.1479 | 1.08884 | (3.354) | 1.635 |

Value in parentheses was estimated

# References

1. Properties are those given by the supplier.

2. J. D. Cox, H. A. Gundry, A. J. Head, *Trans. Faraday Soc.* 1964, **60**, 653.

3. S. Inagaki, S. Murata, M. Sakiyama, *Bull. Chem. Soc. Jpn.*1982, **55**, 2808.

4. *CRC Handbook of Chemistry and Physics.* R.C. Weast, M.J. Astle, W.H. Beyer: editors. CRC Press: Boca Raton. 65th edn. 1985.

5. R. Fuchs, *J. Chem. Thermodynamics* 1989, **11**, 959.
